# Supplementary material for: Manganese Superoxide Dismutase Gene Expression Is Induced by Nanog and Oct4, Essential Pluripotent Stem Cells’ Transcription Factors
Source: PLoS One. 2015 Dec 7;10(12):e0144336. doi: 10.1371/journal.pone.0144336 (PMC4671669; doi:10.1371/journal.pone.0144336)
Supplement: S3 Table — Analysis of gene promoter sequences range from transcription start site (+1) to 5 kbp upstream using the MatInspector software. * Composed binding site for Oct4, Sox2, Nanog, Tcf3 (Tcf7l1) and Sall4b in pluripotent cells. Sod: Superoxide dismutase; Prdx: Peroxiredoxin; Gpx: Glutathione peroxidase; Cat: Catalase; Glrx: Glutaredoxin; Txn: Thioredoxin; Txnrd: Thioredoxin reductase; Gsr: Glutathione reductase. (XLSX) [file pone.0144336.s005.xlsx]

## Sheet: Hoja1
Sod1
Transcription factor	# putative binding sites	Position		Sequence
		From	To	Capitals: core sequence
Oct4	5	521	539	gccccctGCATgacagaca
		764	782	agtgtctGCATttggtggc
		1179	1197	ttcatttACATttcaaatg
		1415	1433	tgcctcaGCATccctagta
		2185	2203	gatgtatGCATgagctctt
Nanog	5	1450	1468	agctgggAATGgtggggca
		1650	1668	ggtatggAATGagcaaagg
		1863	1881	catctgtAATGggaaataa
		2761	2779	gccccttAATGgtcacgct
		3996	4014	ctaagtgAATGccaaaatc
Sox2	1	3092	3116	tttggACAAaggccctttggctggg
Stem*	2	1068	1086	taaatttGCAAgaccaagg
		4569	4587	ttattatACATaataagta
* Composed binding site for Oct4, Sox2, Nanog, Tcf3 (Tcf7l1) and Sall4b in pluripotent cells.
Sod2
Transcription factor	# putative binding sites	Position		Sequence
		From	To	Capitals: core sequence
Oct4	8	546	564	aatgtttCCATaacaatta
		893	911	tccattaTCATtaaggtgg
		1200	1218	gcattttGCATtatgctat
		1961	1979	atcctttGCATgacccctt
		2295	2313	ctcttatACATtaccaagt
		2421	2439	tacttaaTCATtactagtt
		2630	2648	gatctctGCATtcaaggtc
		4597	4615	agcatcaGCATgtctcaca
Nanog	6	579	597	tctacttAATGggtttatg
		1041	1059	tggttggAATGggtgtgtc
		1093	1111	gccagggAATGgcaccatc
		3133	3151	ggggcttAATGggtcatcc
		3234	3252	accagggAATGgcaccatc
		4769	4787	ctctctgAATGtgtatgcc
Sox2	3	2902	2926	cattgACAAaggaagtttcaaaaaa
		3104	3128	cagcaACAAagtcttccatattcct
		4574	4598	ctgggACAAagaatggtgctgacat
Stem	2	3783	3801	aatttcaGCATtacaaatc
		4788	4806	ttccttgGCATccaaattt
Cat
Transcription factor	# putative binding sites	Position		Sequence
		From	To	Capitals: core sequence
Oct4	1	4006	4024	cacatatGCATgagggtga
Nanog	2	1137	1155	cacagtgAATGgtattatt
		3050	3068	ccaactgAATGtctaatct
Sox2	1	2525	2549	aggagACAAaggatgaaggcgaaca
Stem	2	3858	3876	ttttttaGCAGcagaaaca
		4057	4075	aagaaaaGCATattaaagc
Prdx1
Transcription factor	# putative binding sites	Position		Sequence
		From	To	Capitals: core sequence
Oct4	13	587	605	tttctgtGCATtggtgttt
		1253	1271	ccttataGCATgactttct
		1417	1435	cagataaGCATtacttcct
		1719	1737	tttgttaGCATaataccta
		2030	2048	agtgtgtGCATgcatgtgt
		2168	2186	aggtttgGCATcacgtgcc
		2465	2483	cttttatGCATttatcaat
		4087	4105	tttctttGCATatataacg
		4106	4124	attttatGCATatgaatgt
		4109	4127	ttcatatGCATaaaataac
		4274	4292	ctgatctCCATttgcatgc
		4280	4298	tccatttGCATgccataat
		4825	4843	ttcatgaGCATgattcacc
Nanog	1	4099	4117	gcatatgAATGttttcttt
Sox2	0
Stem	0
Prdx2
Transcription factor	# putative binding sites	Position		Sequence
		From	To	Capitals: core sequence
Oct4	0
Nanog	2	2833	2851	tgaagttAATGgctctcca
		3077	3095	aaacatgAATGgaggtagt
Sox2	4	612	636	tgagaACAAaaggtagtacggttgg
		905	929	aactcACAAaggctggtgccccaca
		1335	1359	tagcaACAAagtaatttttatgctc
		1709	1733	accatACAAaggatttgtccaggga
Stem	3	1330	1348	ctcctgaGCATaaaaatta
		1391	1409	ataattgACATaataaatg
		3063	3081	cagatagCCATtacaaaca
Gpx1
Transcription factor	# putative binding sites	Position		Sequence
		From	To	Capitals: core sequence
Oct4	5	2835	2853	acagtcaGCATgacttttt
		3080	3098	atgctctGCATaagagtca
		4033	4051	attttgtGCATtttgtctt
		4358	4376	gcattgtGCATtttttttg
		4848	4866	atcaggaGCATgcccacta
Nanog	4	1073	1091	cttcttgAATGgcaccagc
		2610	2628	cattggtAATGggatctga
		3511	3529	gaggatgAATGgatgggtg
		3669	3687	atctgtgAATGccaacagt
Sox2	1	119	143	caataACAAcggctaaagcagctca
Stem	3	2313	2331	ctcgtggCCATctcaaaaa
		2721	2739	ctgtttaGCAAaacaaaac
		4141	4159	cagctcaGCAGataaaagg
Gpx4
Transcription factor	# putative binding sites	Position		Sequence
		From	To	Capitals: core sequence
Oct4	4	1315	1333	tgtgtttTCATggcaatgg
		2289	2307	gggatctGCATatggagtg
		2817	2835	ccactttGCATaacttaat
		4656	4674	tgtgtttTCATtttaatcc
Nanog	5	1018	1036	actatggAATGgcaaaagt
		2762	2780	ccctgggAATGagaagccg
		3795	3813	tcccctgAATGgctgtgat
		3894	3912	ggtagggAATGgtctccta
		4200	4218	gtgtgttAATGggaattaa
Sox2	5	2626	2650	tagaaACAAaggctggggcttaagg
		2642	2666	agaaaACAAaggaaattagaaacaa
		3014	3038	ccataACAAaaggagactgactccg
		3680	3704	gcaggACAAagggaaccctagtccc
		3690	3714	cctagACAAagggactagggttccc
Stem	3	1314	1332	gccattgCCATgaaaacac
		3007	3025	ttcatccCCATaacaaaag
		3395	3413	gatatttACATtacaattc
Txn1
Transcription factor	# putative binding sites	Position		Sequence
		From	To	Capitals: core sequence
Oct4	6	621	639	tacatgtGCATggggcaca
		1654	1672	cctgtctGCATccccactt
		3447	3465	atagttaGCATtactaaga
		3787	3805	aatatatGCATctaacaag
		3956	3974	ttaatatGCATtgatcaga
		4538	4556	agattttGCATtgtaccta
Nanog	4	4031	4049	tctactgAATGtatatgaa
		4137	4155	tgatgggAATGtgagctat
		4177	4195	aacaaatGCATgtgaaaaa
		4348	4366	ttcatttAATGgtggaaat
		4447	4465	atatatgAATGttcatctc
Sox2	0
Stem	6	2276	2294	cccatttGCAAcgaaatct
		2490	2508	tgcagagGCATaaaaaagc
		3217	3235	agagttaACATttaaagta
		3232	3250	agttttaACATctaaagag
		3675	3693	gaaattgTCATatcaagaa
		4177	4195	aacaaatGCATgtgaaaaa
Txn2
Transcription factor	# putative binding sites	Position		Sequence
		From	To	Capitals: core sequence
Oct4	8	766	784	cccactgGCATgagtgact
		797	815	acaatatGCATaaatgagg
		800	818	catttatGCATattgtaac
		1032	1050	ctcatctGCATatacttag
		1912	1930	aagatctGCATgaggcagg
		3016	3034	tggctctGCATtagaattc
		3719	3737	gatctgtGCATtcagggac
		4548	4566	gtgctttGCATggcatttg
Nanog	1	139	157	cggaaggAATGggatcgtg
Sox2	1	3054	3078	ggccaACAAaggtaaggtgactaca
Stem	1	4811	4829	gggggtgGCATctcaatgg
Glrx1
Transcription factor	# putative binding sites	Position		Sequence
		From	To	Capitals: core sequence
Oct4	9	431	449	catttttACATgtcaagaa
		2177	2195	atactgtGCATgctggaaa
		2257	2275	atcatgtGCATgcctggtg
		2299	2317	ttcttatGCATatgggtat
		2302	2320	cccatatGCATaagaatga
		3519	3537	tccattaCCATcaaggtag
		4066	4084	gagatctGCATgcctgtct
		4649	4667	gagatcaGCATcactgagg
		4875	4893	cttctttGCATtacctctt
Nanog	1	430	448	tttcctgAATGgttgtgtt
Sox2	3	927	951	gagtgACAAagaaagcagcccccag
		2486	2510	caaagACAAtggtccttatgtgtct
		3766	3790	cagcaACAAagtcttctatattcct
Stem	1	300	318	gttcttgACATgtaaaaat
Glrx2
Transcription factor	# putative binding sites	Position		Sequence
		From	To	Capitals: core sequence
Oct4	5	828	846	cccagggGCATaacatgtt
		2054	2072	aacatatCCATtactccta
		2834	2852	cgtatctACATatttatgt
		3608	3626	gttctgtGCATgcttacag
		4850	4868	tttctatACATtttaaatt
Nanog	2	1097	1115	ggtagtgAATGgtatccca
		2640	2658	agtttggAATGgattcaga
Sox2	3	347	371	cacgtACAAagggctattattaccg
		929	953	aaacaACAAaagccacagtaacttt
Stem	4	2093	2111	ttactgtACATtaaaacat
		2993	3011	agattaaCCATcacaaact
		3169	3187	ttcttccTCATtagaatgc
		4095	4113	gacctaaGCAAgacaattc
Txnrd1
Transcription factor	# putative binding sites	Position		Sequence
		From	To	Capitals: core sequence
Oct4	10	717	735	tgtttctGCATgcacccct
		875	893	catgtgtGCATgtagatgc
		929	947	tcactttTCATgtttatgt
		1060	1078	cagctatACATaataaata
		2373	2391	tacatatTCATgacctaac
		2816	2834	tcattttGCATttttatct
		2872	2890	cccataaGCATttaaagtc
		3694	3712	catatatGCATtcatctta
		4095	4113	gtccttgGCATgaatgcct
		4340	4358	aaaatttGCATataaaaca
Nanog	4	2450	2468	tctgctgAATGtttggctg
		2639	2657	gagcctgAATGgcttttta
		3773	3791	ttggtggAATGgtcctgtg
		4090	4108	tggcatgAATGccttggca
Sox2	1	1984	2008	ccgtcACAAaggtcaagaattcagt
Stem	2	928	946	cacataaACATgaaaagtg
		1722	1740	tctagaaGCATgaaaatgt
Txnrd2
Transcription factor	# putative binding sites	Position		Sequence
		From	To	Capitals: core sequence
Oct4	8	97	115	agaatctGCATgcaccgaa
		383	401	aaggtttGCATcccaatcc
		2253	2271	cacatgtGCATcatggtag
		2707	2725	acctcatGCATaccaagca
		2710	2728	ttggtatGCATgaggtcct
		3002	3020	aactcaaGCATgacgttgc
		4344	4362	gatctctGCATtggaggcc
		4409	4427	tgcctttGCATtttggttt
Nanog	1	180	198	gctggggAATGgggacaca
Sox2	3	843	867	ggggaACAAaggagcacagaatcca
		1706	1730	ttggaACAAaagcctgatggttttg
		2664	2688	aaagaACAAaggctggggaatgtag
Stem	1	2029	2047	aatatggACATcagaaggc
Gsr
Transcription factor	# putative binding sites	Position		Sequence
		From	To	Capitals: core sequence
Oct4	8	1872	1890	gccactgGCATtaaaggtg
		2369	2387	cttattgGCATatctaaag
		2434	2452	atctttaACATtacatcta
		2570	2588	cacgtgtGCATgcatgtgc
		3322	3340	gagatgtGCATgctgggaa
		3730	3748	gctgtatGCATgaatcctg
		3768	3786	cttgtttGCATttatataa
		3868	3886	catctatGCATggcctctg
Nanog	8	523	541	aatcattAATGgttcccaa
		808	826	gccgctgAATGttttaaag
		1421	1439	taccctgAATGgatgatag
		2387	2405	tggaattAATGgatgcaac
		2531	2549	tagatgtAATGggtttttt
		2552	2570	tagtgtgAATGtgtgtgtg
		3405	3423	cacacttAATGtgcacagc
		3612	3630	gcaagggAATGgggagaag
Sox2	1	4777	4801	ggctaACAAagttgctcctctcttt
Stem	1	3906	3924	agtgtgtGCAGaaaaatgc
